# Supplementary material
Source: HighWire-hosted journal article supplement (https://bmjopenrespres.bmj.com/content/10/1/e001391)
Supplement: inline-supplementary-material-6 [file inline-supplementary-material-6.xls]

## Sheet: MUG mapped to MatrisomeDB
Ensembl ID	NCBI Gene ID	Gene Symbol	chr.band	logFC	P.Value	adj.P.Val
ENSG00000123500	1300	COL10A1	6q21-q22	6.01525	4.96e-08	1.9e-05
ENSG00000145536	170690	ADAMTS16	5p15	4.83312	1.54e-06	0.000125049
ENSG00000145423	6423	SFRP2	4q31.3	4.79102	8.65e-08	2.53e-05
ENSG00000275896	5645	PRSS2	7q34	4.77911	0.000399593	0.00591724
ENSG00000106819	54829	ASPN	9q22	4.74658	2.46e-07	4e-05
ENSG00000160161	148113	CILP2	19p13.11	4.24762	4e-08	1.73e-05
ENSG00000145824	9547	CXCL14	5q31	4.20566	1.34e-06	0.000113935
ENSG00000120332	63923	TNN	1q23-q24	4.19353	3.58e-08	1.64e-05
ENSG00000149090	25891	PAMR1	11p13	4.04921	2.59e-10	8.69e-07
ENSG00000164932	115908	CTHRC1	8q22.3	3.9545	4.43e-08	1.75e-05
ENSG00000099953	4320	MMP11	22q11.23	3.75424	0.00122482	0.012812
ENSG00000105664	1311	COMP	19p13.1	3.75058	3.96e-07	5.17e-05
ENSG00000187955	7373	COL14A1	8q23	3.70922	1.73e-06	0.000133239
ENSG00000135925	80326	WNT10A	2q35	3.68244	4.58e-09	5.11e-06
ENSG00000133110	10631	POSTN	13q13.3	3.56288	4.63e-05	0.00128185
ENSG00000172987	60495	HPSE2	10q23-q24	3.46359	1.91e-06	0.000143189
ENSG00000106823	1842	ECM2	9q22.3	3.38483	1.46e-07	3.02e-05
ENSG00000156103	4325	MMP16	8q21.3	3.31401	3.91e-07	5.15e-05
ENSG00000117122	4237	MFAP2	1p36.1-p35	3.06344	2.51e-09	4.22e-06
ENSG00000106809	4969	OGN	9q22	3.04752	9.44e-06	0.000421239
ENSG00000137573	23213	SULF1	8q13.2	3.01775	5.06e-07	5.85e-05
ENSG00000137673	4316	MMP7	11q22.2	3.01382	3.65e-06	0.000221604
ENSG00000119681	4053	LTBP2	14q24	2.92874	2.12e-06	0.000152767
ENSG00000204291	1306	COL15A1	9q21-q22	2.92282	1.89e-05	0.000705942
ENSG00000166670	4319	MMP10	11q22.3	2.88008	0.00336615	0.0266102
ENSG00000148848	8038	ADAM12	10q26	2.81996	8.89e-06	0.000406281
ENSG00000107562	6387	CXCL12	10q11.1	2.75832	2.93e-07	4.42e-05
ENSG00000148702	3026	HABP2	10q25.3	2.74097	0.000121688	0.00260669
ENSG00000198759	25975	EGFL6	Xp22	2.7372	4.71e-07	5.7e-05
ENSG00000145861	114898	C1QTNF2	5q33.3	2.69902	2.71e-08	1.49e-05
ENSG00000163520	2199	FBLN2	3p25.1	2.65526	2.15e-07	3.8e-05
ENSG00000178031	92949	ADAMTSL1	9p21.3	2.6421	8.48e-06	0.000396864
ENSG00000049323	4052	LTBP1	2p22-p21	2.61214	1.18e-07	2.69e-05
ENSG00000164946	158326	FREM1	9p22.3	2.57713	9.49e-06	0.000421938
ENSG00000114948	8745	ADAM23	2q33	2.54993	1.25e-05	0.000516807
ENSG00000017427	3479	IGF1	12q23.2	2.52643	7.59e-07	7.87e-05
ENSG00000160963	136227	COL26A1	7q22.1	2.51971	1.31e-05	0.000534736
ENSG00000143341	83872	HMCN1	1q25.3-q31.1	2.50782	1.61e-05	0.000623181
ENSG00000149968	4314	MMP3	11q22.3	2.50237	0.000996103	0.010962
ENSG00000113578	2246	FGF1	5q31	2.49805	7.4e-08	2.45e-05
ENSG00000168542	1281	COL3A1	2q31	2.46376	4.69e-05	0.00129657
ENSG00000123243	80760	ITIH5	10p14	2.45311	1.95e-07	3.6e-05
ENSG00000186340	7058	THBS2	6q27	2.3509	0.000136075	0.00281606
ENSG00000104332	6422	SFRP1	8p11.21	2.33258	0.000231923	0.00407123
ENSG00000182752	5069	PAPPA	9q33.2	2.31722	5.05e-06	0.000279269
ENSG00000113296	7060	THBS4	5q13	2.29596	1.03e-05	0.000443223
ENSG00000171502	255631	COL24A1	1p22.3	2.27696	0.00176893	0.016898
ENSG00000149380	283208	P4HA3	11q13.4	2.27612	2.02e-05	0.000740524
ENSG00000137077	6366	CCL21	9p13	2.26717	5.21e-06	0.000283513
ENSG00000101230	140862	ISM1	20p12.1	2.25393	2.12e-05	0.000763689
ENSG00000100448	1511	CTSG	14q11.2	2.24835	0.00146323	0.0146388
ENSG00000271503	6352	CCL5	17q12	2.2356	1.56e-05	0.000612328
ENSG00000197992	283420	CLEC9A	12p13.2	2.22996	6.13e-06	0.000308596
ENSG00000164692	1278	COL1A2	7q22.1	2.2107	1.98e-05	0.000732091
ENSG00000129038	4016	LOXL1	15q22	2.20293	3.63e-07	5.04e-05
ENSG00000146197	222663	SCUBE3	6p21.3	2.18879	0.00342402	0.0269566
ENSG00000136859	23452	ANGPTL2	9q34	2.15956	1.26e-06	0.000109608
ENSG00000135919	5270	SERPINE2	2q36.1	2.14047	8.69e-06	0.000398189
ENSG00000101144	655	BMP7	20q13	2.11287	2.14e-06	0.000152767
ENSG00000132561	4147	MATN2	8q22	2.09695	5.92e-07	6.46e-05
ENSG00000164318	133584	EGFLAM	5p13.2-p13.1	2.03902	3.58e-06	0.000219863
ENSG00000140511	145864	HAPLN3	15q26.1	2.0199	1.08e-05	0.000461082
ENSG00000105472	6320	CLEC11A	19q13.3	2.01981	2.77e-06	0.000186179
ENSG00000111341	4256	MGP	12p12.3	1.99524	4.12e-07	5.23e-05
ENSG00000161381	57125	PLXDC1	17q21.1	1.9862	1.28e-05	0.000524282
ENSG00000136943	1515	CTSV	9q22.2	1.9563	7.96e-05	0.00187966
ENSG00000144152	129804	FBLN7	2q13	1.95391	5.79e-07	6.42e-05
ENSG00000171812	1296	COL8A2	1p34.2	1.93487	2.08e-06	0.000152767
ENSG00000100473	1690	COCH	14q11.2-q13	1.90995	1.4e-05	0.000561744
ENSG00000225968	392617	ELFN1	7p22.3	1.90166	0.000283509	0.00465502
ENSG00000169884	7480	WNT10B	12q13	1.89756	5.13e-05	0.0013964
ENSG00000132514	10462	CLEC10A	17p13.1	1.86878	2.17e-05	0.000775664
ENSG00000163453	3490	IGFBP7	4q12	1.86873	1.34e-07	2.86e-05
ENSG00000136689	3557	IL1RN	2q14.2	1.86005	2.94e-05	0.000931814
ENSG00000134013	4017	LOXL2	8p21.3	1.85935	1.52e-05	0.000597575
ENSG00000090539	8646	CHRD	3q27	1.85909	2.08e-05	0.000758039
ENSG00000065320	9423	NTN1	17p13.1	1.80921	0.000474101	0.00662092
ENSG00000143387	1513	CTSK	1q21	1.78509	2.68e-05	0.000869238
ENSG00000154736	11096	ADAMTS5	21q21.3	1.77579	0.000275286	0.00457594
ENSG00000120057	6425	SFRP5	10q24.1	1.76526	0.00346311	0.0271213
ENSG00000132000	79883	PODNL1	19p13.12	1.73639	2.36e-05	0.000816528
ENSG00000121005	83690	CRISPLD1	8q21.11	1.72663	0.00018515	0.00349977
ENSG00000041982	3371	TNC	9q33	1.63647	0.000183602	0.00349286
ENSG00000128342	3976	LIF	22q12.2	1.60821	0.00676187	0.0438103
ENSG00000123610	7130	TNFAIP6	2q23.3	1.58119	0.000912331	0.0103976
ENSG00000135253	375616	KCP	7q32.1	1.53184	0.000177061	0.00342668
ENSG00000196562	55959	SULF2	20q13.12	1.53046	0.000132227	0.00275797
ENSG00000186998	129080	EMID1	22q12.2	1.52018	3.17e-05	0.000981782
ENSG00000095752	3589	IL11	19q13.3-q13.4	1.50125	0.00684353	0.0441901
ENSG00000167992	220001	VWCE	11q12.2	1.4918	0.000723149	0.00882163
ENSG00000141753	3487	IGFBP4	17q21.2	1.4879	3.1e-05	0.000965836
ENSG00000168056	4054	LTBP3	11q13.1	1.45927	0.00051687	0.00698398
ENSG00000204396	80737	VWA7	6p21.33	1.43069	0.000735494	0.00894784
ENSG00000049089	1298	COL9A2	1p33-p32	1.42552	0.000654334	0.00830657
ENSG00000173918	114897	C1QTNF1	17q25.3	1.30681	0.000651285	0.00827569
ENSG00000221866	91584	PLXNA4	7q32.3	1.2998	0.00146619	0.0146521
ENSG00000166033	5654	HTRA1	10q26.3	1.29532	5.54e-06	0.000291733
ENSG00000164764	157869	SBSPON	8q21.11	1.28449	0.00267091	0.0226757
ENSG00000111186	81029	WNT5B	12p13.3	1.27344	0.000351769	0.00544938
ENSG00000134363	10468	FST	5q11.2	1.26777	0.00100847	0.0110479
ENSG00000122861	5328	PLAU	10q22.2	1.25675	0.00297794	0.0245078
ENSG00000115318	84695	LOXL3	2p13	1.24376	0.00140451	0.0141835
ENSG00000174080	8722	CTSF	11q13	1.20285	0.00041976	0.00612139
ENSG00000104432	3574	IL7	8q12-q13	1.18571	0.000697107	0.00866128
ENSG00000130812	83854	ANGPTL6	19p13.2	1.16906	0.000184276	0.00349577
ENSG00000131187	2161	F12	5q35.3	1.14589	0.000676017	0.00850172
ENSG00000115457	3485	IGFBP2	2q35	1.12457	0.00325187	0.0261063
ENSG00000090534	7066	THPO	3q27	1.09089	0.00199414	0.0182804
ENSG00000132386	5176	SERPINF1	17p13.3	1.05645	0.00462055	0.0330936
ENSG00000169231	7059	THBS3	1q21	1.02923	0.00194906	0.0180164
ENSG00000138131	84171	LOXL4	10q24	0.876856	0.00656476	0.0430524
